CORRECTION

# Correction: Behavioral and Neural Correlates of Executive Functioning in Musicians and Non-Musicians

Jennifer Zuk, Christopher Benjamin, Arnold Kenyon, Nadine Gaab

There is an error in [Table 1](#). The Mean ± SD of ‘Duration of musical training (years)’ for ‘Adult Musicians’ is incorrect. Please see the correct [Table 1](#) here.

**Table 1. Group characteristics of musical experience in adult musicians and musically trained children.**

|                                            | Mean ± SD                 |
|--------------------------------------------|---------------------------|
| <b>Adult Musicians (n = 15)</b>            |                           |
| <i>Group Characteristics</i>               |                           |
| Age at onset of musical training (years)   | 5.73 ± 1.62               |
| Intensity of practice time/week (hours)    | 21.87 ± 11.49             |
| Duration of musical training (years)       | 18.93 ± 3.13              |
| <i>Type of Musical Instrument</i>          |                           |
|                                            | <i>Number of adults</i>   |
| Piano                                      | 6                         |
| Strings                                    | 5                         |
| Woodwinds                                  | 1                         |
| Brass                                      | 2                         |
| Harp                                       | 1                         |
| <b>Musically Trained Children (n = 15)</b> |                           |
| <i>Group Characteristics</i>               |                           |
| Age at onset of musical training (years)   | 5.86 ± 1.41               |
| Intensity of practice time/week (hours)    | 3.74 ± 2.63               |
| Duration of musical training (years)       | 5.2 ± 1.33                |
| <i>Type of Musical Instrument</i>          |                           |
|                                            | <i>Number of children</i> |
| Piano                                      | 5                         |
| Strings                                    | 5                         |
| Woodwinds                                  | 2                         |
| Guitar                                     | 1                         |
| Percussion                                 | 2                         |

doi:10.1371/journal.pone.0137930.t001

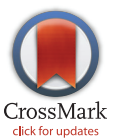

**OPEN ACCESS**

**Citation:** Zuk J, Benjamin C, Kenyon A, Gaab N (2015) Correction: Behavioral and Neural Correlates of Executive Functioning in Musicians and Non-Musicians. PLoS ONE 10(9): e0137930. doi:10.1371/journal.pone.0137930

**Published:** September 2, 2015

**Copyright:** © 2015 Zuk et al. This is an open access article distributed under the terms of the [Creative Commons Attribution License](#), which permits unrestricted use, distribution, and reproduction in any medium, provided the original author and source are credited.

**Reference**

1. Zuk J, Benjamin C, Kenyon A, Gaab N (2014) Behavioral and Neural Correlates of Executive Functioning in Musicians and Non-Musicians. PLoS ONE 9(6): e99868. doi:10.1371/journal.pone.0099868 PMID: [24937544](#)
